# Supplementary material for: Revalidation of morphological characteristics and multiplex PCR for the identification of three congener invasive Liriomyza species (Diptera: Agromyzidae) in China
Source: PeerJ. 2020 Oct 30;8:e10138. doi: 10.7717/peerj.10138 (PMC7605219; doi:10.7717/peerj.10138)
Supplement: Supplemental Information 1 [file peerj-08-10138-s001.xlsx]

## Sheet: Sheet1
The ratio of the length of ultimate section of vein CuA1 divided by penultimate section.
Species	L. trifolii		L. sativae		L.huidobrensis
1	1.99602	1	1.89254	1	1.90548
2	2.00761	2	2.15636	2	2.0194
3	2.03866	3	2.15751	3	2.11857
4	2.10687	4	2.30498	4	2.16158
5	2.12616	5	2.39269	5	2.41135
6	2.1293	6	2.4286	6	2.55613
7	2.13115	7	2.44435
8	2.1466	8	2.49346
9	2.17375	9	2.49849
10	2.20059	10	2.50005
11	2.20142	11	2.52613
12	2.21294	12	2.53373
13	2.22283	13	2.55243
14	2.22372	14	2.55835
15	2.22501	15	2.56707
16	2.26775	16	2.64136
17	2.26791	17	2.64343
18	2.27246	18	2.6446
19	2.27491	19	2.72611
20	2.28408	20	2.7389
21	2.28623	21	2.76106
22	2.30282	22	2.85766
23	2.30647	23	2.95654
24	2.32712	24	2.96565
25	2.32801	25	2.9822
26	2.32991	26	2.98243
27	2.3351	27	2.98845
28	2.3364	28	3.019
29	2.36122	29	3.02415
30	2.36273	30	3.15243
31	2.37435	31	3.28965
32	2.3851	32	3.3044
33	2.38772	33	3.38988
34	2.39378	34	3.56579
35	2.39708
36	2.39731
37	2.40225
38	2.40927
39	2.41232
40	2.43101
41	2.43562
42	2.43861
43	2.43922
44	2.44243
45	2.44264
46	2.44606
47	2.45724
48	2.46095
49	2.48111
50	2.48623
51	2.48747
52	2.48853
53	2.49467
54	2.50018
55	2.5023
56	2.50624
57	2.5072
58	2.51545
59	2.5184
60	2.5184
61	2.53909
62	2.54119
63	2.54356
64	2.544
65	2.55082
66	2.56083
67	2.56259
68	2.56692
69	2.56805
70	2.57753
71	2.581
72	2.58922
73	2.59124
74	2.59579
75	2.59849
76	2.59876
77	2.60451
78	2.61554
79	2.61821
80	2.6289
81	2.63236
82	2.63385
83	2.63543
84	2.64248
85	2.64358
86	2.64588
87	2.65184
88	2.65198
89	2.66013
90	2.66196
91	2.67173
92	2.672
93	2.67304
94	2.67346
95	2.67792
96	2.67853
97	2.6799
98	2.68833
99	2.68848
100	2.69079
101	2.69819
102	2.70169
103	2.70236
104	2.70549
105	2.70897
106	2.71818
107	2.72567
108	2.72677
109	2.72922
110	2.73129
111	2.73191
112	2.73522
113	2.73561
114	2.74417
115	2.74428
116	2.74595
117	2.75756
118	2.77243
119	2.77295
120	2.7748
121	2.7786
122	2.78857
123	2.8054
124	2.8064
125	2.81291
126	2.81751
127	2.81869
128	2.82183
129	2.82184
130	2.82389
131	2.82692
132	2.8276
133	2.8309
134	2.83876
135	2.83913
136	2.84653
137	2.84683
138	2.84713
139	2.85231
140	2.85698
141	2.85709
142	2.85906
143	2.86109
144	2.86965
145	2.87111
146	2.87476
147	2.87903
148	2.87988
149	2.89426
150	2.89792
151	2.89947
152	2.90162
153	2.90587
154	2.90768
155	2.91027
156	2.91767
157	2.9256
158	2.94279
159	2.95453
160	2.96287
161	2.96582
162	2.96684
163	2.97153
164	2.97903
165	2.98617
166	2.98792
167	2.99324
168	2.99666
169	3.00451
170	3.01327
171	3.0323
172	3.03941
173	3.04459
174	3.08999
175	3.12553
176	3.15418
177	3.155
178	3.15625
179	3.15662
180	3.15751
181	3.17217
182	3.17492
183	3.17861
184	3.17925
185	3.18405
186	3.18741
187	3.19703
188	3.23588
189	3.2361
190	3.25529
191	3.30707
192	3.32558
193	3.34036
194	3.34158
195	3.39711
196	3.47403
197	3.51229
198	3.52084
